# Supplementary material
Source: MDPI journal article supplement (https://www.mdpi.com/2227-9040/9/6/128)
Supplement: s1 [file s1]

Supplementary Materials for

# “Out of pocket” Protein Binding—A Dilemma of Epitope Imprinted Polymers Revealed for Human Hemoglobin

Xiaorong Zhang <sup>1,†</sup>, Giorgio Caserta <sup>2,†</sup>, Aysu Yarman <sup>1</sup>, Eszter Supala <sup>3</sup>, Armel F. Tadjoung Waffo <sup>2</sup>, Ulla Wollenberger <sup>1</sup>, Róbert E. Gyurcsányi <sup>3,\*</sup>, Ingo Zebger <sup>2,\*</sup> and Frieder W. Scheller <sup>1,\*</sup>

(A)

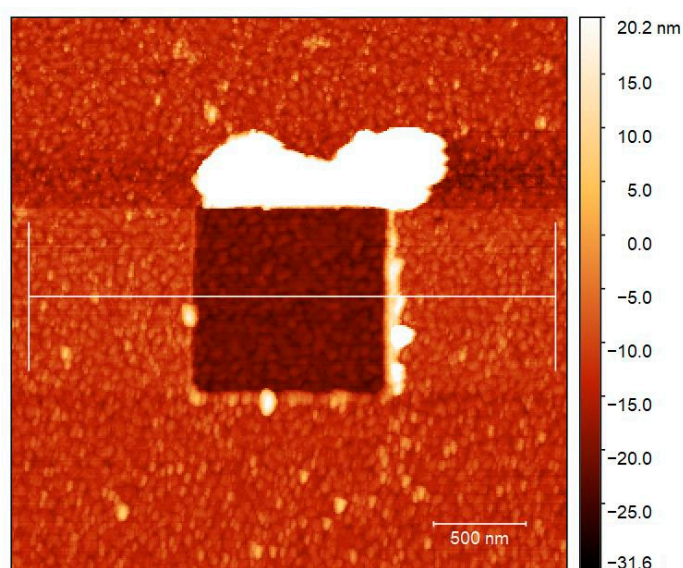

(B)

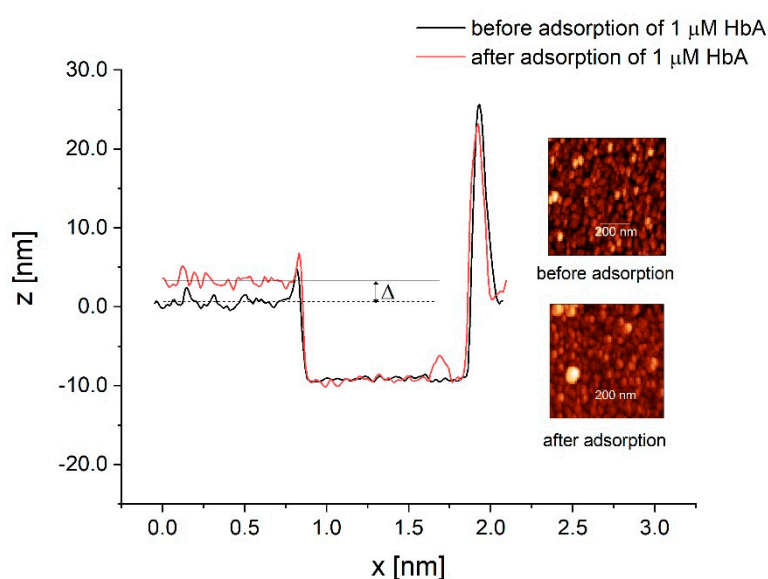

**Figure S1.** (A) The topographic images of the non-imprinted polymer film were used for the thickness measurements after removal of a  $1 \times 1 \mu\text{m}$  rectangular area from the polymer. The removal stops at the underlying gold surface. The bright regions are due to removed material pushed to the sides of the rectangular area during the removal process. The difference of the film

thickness ( $\Delta$ ) after and before adsorption of  $1\mu\text{M}$  HbA, as illustrated in the representative cross-sectional profiles (B), indicates the adsorption of HbA (see Table 2 for quantitative data).

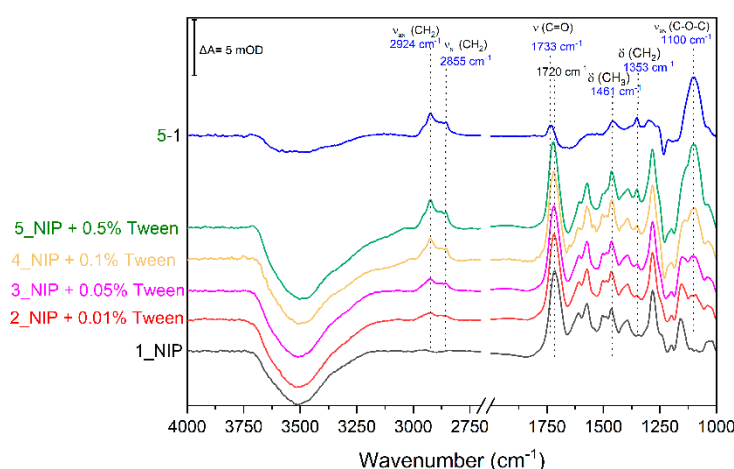

**Figure S2.** IR absorbance spectra of Tween binding on polyscopoletin (NIP). Spectra were recorded using different concentrations of Tween (0.01 % - trace 2, red; 0.05 % - trace 3, magenta; 0.1 % - trace 4, yellow; 0.5 % - trace 5, green) and compared to the bare NIP shown in dark trace 1. The binding of Tween (0.05 %) is better visualized in the corresponding difference spectrum between trace 5 and trace 1. Here, the observed bands are attributed to the  $\nu(\text{C-O-C})$  stretching vibration mode of  $-\text{CH}_2\text{-O-CH}_2-$  chains ( $1100\text{ cm}^{-1}$ ), the  $\delta(\text{CH}_2)$  bending mode from the ethylene subunit ( $1451\text{ cm}^{-1}$  and  $1353\text{ cm}^{-1}$ ), the  $\nu(\text{C=O})$  stretching mode arising from the carbonyl groups ( $1733\text{ cm}^{-1}$ ), and the asymmetric and symmetric methylene stretching vibration modes  $\nu(\text{CH}_2)$  at  $2924\text{ cm}^{-1}$  and  $2855\text{ cm}^{-1}$ , respectively [1].

Table S1. MIPs prepared by epitope approaches.

| Peptide-MIPs    |                                                                                              |                                                            |                                      |                           |                                                                                        |           |
|-----------------|----------------------------------------------------------------------------------------------|------------------------------------------------------------|--------------------------------------|---------------------------|----------------------------------------------------------------------------------------|-----------|
| Template        | MIP structure                                                                                | Epitope/peptide                                            | Selectivity                          | Linear measuring range    | IF and K <sub>d</sub>                                                                  | Reference |
| HbA             | Free radical polymerization of peptides-decorated silica beads followed by removal of silica | N-terminal sequences of both $\alpha$ - and $\beta$ -chain | BSA, Mb                              | n.d.                      | IF = ~ 1.7 for HbA                                                                     | [2]       |
| Insulin         | EP of <i>o</i> -PD on epitope modified gold surface                                          | C-terminal peptide                                         | Insulin in serum samples             | 10 - 500 fM for insulin   | n.d.                                                                                   | [3]       |
| Cyt c, ADH, BSA | Photopolymerization of MIP on a glass or silicon surface                                     | C-terminal nonapeptides of each protein                    | Exchange of one amino acid           | 0 - 289 nM for Cyt c      | K <sub>d</sub> = 72.3 nM<br>IF = 7 for Cyt c                                           | [4]       |
| Cyt c           | EP of scopoletin on gold                                                                     | Cys-extended C-terminal nonapeptide                        | BSA, Mb                              | 0 - 10 $\mu$ M for Cyt c  | K <sub>d</sub> = 8.54 $\mu$ M and 2.51 $\mu$ M,<br>IF = 6 and 10 for Cyt c and epitope | [5]       |
| Cyt c           | Thermo-sensitive CDs/SiO <sub>2</sub> /MIP                                                   | C- and N-terminal nonapeptides                             | Lysozyme, trypsin                    | 0.1- 40 $\mu$ M for Cyt c | IF = 5.65 for Cyt c                                                                    | [6]       |
| Trf             | Epitope imprinted PES beads                                                                  | N-terminal peptide                                         | RNase B, Cyt c, $\beta$ -LG          | n.d.                      | n.d.                                                                                   | [7]       |
| HSA, IgG, Trf   | Multiepitope imprinted PES particles                                                         | N-terminal peptides of each protein                        | Proteins in human plasma             | n.d.                      | n.d.                                                                                   | [8]       |
| HSA, Trf        | Dual-template imprinted polymer on MCNTs                                                     | C-terminal peptides of each protein                        | BSA, Mb, Cyt C                       | n.d.                      | IF = 2.57 for HSA<br>IF = 2.17 for Trf                                                 | [9]       |
| NSE             | EP of scopoletin on the peptide modified QCM chips                                           | NSE derived synthetic peptide                              | Nonspecific peptides and BSA         | n.d.                      | K <sub>d</sub> = 12.2 $\mu$ M and 53 pM for peptide and NSE<br>IF = 4.6 for NSE        | [10]      |
| IgG             | Polymerization of the template modified glass beads                                          | Fc domain                                                  | n.d.                                 | n.d.                      | K <sub>d</sub> = 27.4 nM for IgG                                                       | [11]      |
| Cyt c           | Reverse microemulsion polymerization of APTES on QCM                                         | C-terminus octapeptide                                     | Mb, HSA, HRP, human serum            | 0.40 – 4.0 nM for Cyt c   | IF = 3.0 for Cyt c                                                                     | [12]      |
| B2M             | Polycondensation of multiple silylating reagents                                             | C-terminus nonapeptide                                     | RNase A, RNase B, HRP, BSA           | n.d.                      | K <sub>d</sub> = 0.2 $\mu$ M and IF = 5.8 for epitope<br>IF = 5.0 for B2M              | [13]      |
| Apha-synuclein  | EP of AN/MSAN with various peptides on screen-printed                                        | 3 peptides encompassed locations of mutations              | Real sample: Culture medium from the | n.d.                      | n.d.                                                                                   | [14]      |

| electrodes |                                                                           | differentiation of midbrain organoids |                               |                                                                                  |                                            |      |
|------------|---------------------------------------------------------------------------|---------------------------------------|-------------------------------|----------------------------------------------------------------------------------|--------------------------------------------|------|
| Tag-MIPs   |                                                                           |                                       |                               |                                                                                  |                                            |      |
| HSA        | Self-polymerization of dopamine on Ni <sup>2+</sup> modified magnetic NPs | His-tag-anchored C-terminal peptide   | BSA, Cyt c                    | n.d.                                                                             | IF = 4.26 for epitope<br>IF = 2.12 for HSA | [15] |
| HSA        | Thermosensitive MIP on modified SiO <sub>2</sub> NPs                      | His-tag-anchored C-terminal peptide   | BSA, Mb, RNase B              | 9 - 15 μM for HSA                                                                | IF = 4.0 for HSA                           | [16] |
| GFP        | His <sub>6</sub> -tag imprinted on the IMAC matrix surface                | His-tag (HHHHHH)                      | GFP from the crude cell lysis | n.d.                                                                             | IF = 7.1 for GFP                           | [17] |
| CD56       | EP of <i>p</i> -ABA and template                                          | Poly-sialic acid                      | CA19-9, PSA, BSA, BHb         | 0.07 – 1.07 pM for CD56                                                          | n.d.                                       | [18] |
| CA 19-9    | EP of <i>o</i> -PD and template on a GCE                                  | Monosaccharide or polysaccharide      | BHb, BSA, Con A               | 1 - 60 U/mL and 0.1 – 5 U/mL for monosaccharide and polysaccharide imprinted MIP | n.d.                                       | [19] |

Abbreviations: ADH: Alcohol dehydrogenase; AN: Aniline; APTES: Amino-propyltriethoxysilane; BHb: Bovine hemoglobin; B2M:  $\beta$ 2-Microglobulin;  $\beta$ -LG:  $\beta$ -Lactoglobulin; BSA: Bovine serum albumin; CA19-9: Carbohydrate antigen 19-9; CD56: A neural cell adhesion molecule; CDs: Carbon dots; ConA: Concanavalin A; Cyt c: Cytochrome c; EP: Electropolymerization; GCE: Glassy carbon electrode; GFP: Green fluorescent protein; HSA: Human serum albumin; HRP: Peroxidase horseradish; IgG: Immunoglobulin G; IMAC: Immobilized metal ion affinity chromatography; *o*-PD: *o*-Phenylenediamine; *p*-ABA: *p*-Aminobenzenboronic acid; PES: Poly(ether sulfone); PSA: Prostate-specific antigen; Mb: Myoglobin; MCNTs: Magnetic carbon nanotubes; MSAN: *m*-Aminobenzenesulfonic acid; n.d.: Not determined; NPs: Nanoparticles; NSE: Neuron specific enolase; QCM: Quartz crystal microbalance sensor; RNase B: Ribonuclease B.

## References

1. Warring, S.L.; Krasowska, M.; Beattie, D.A.; McQuillan, A.J. Adsorption of a Polyethoxylated Surfactant from Aqueous Solution to Silica Nanoparticle Films Studied with in Situ Attenuated Total Reflection Infrared Spectroscopy and Colloid Probe Atomic Force Microscopy. *Langmuir* **2018**, *34*, 13481–13490.
2. Bagán, H.; Zhou, T.; Eriksson, N.L.; Bülow, L.; Ye, L. Synthesis and characterization of epitope-imprinted polymers for purification of human hemoglobin. *RSC Adv.* **2017**, *7*, 41705–41712.
3. Zhao, C.; Ma, X.; Li, J. An Insulin Molecularly Imprinted Electrochemical Sensor Based on Epitope Imprinting. *Chinese J. Anal. Chem.* **2017**, *45*, 1360–1366.
4. Nishino, H.; Huang, C.-S.; Shea, K.J. Selective Protein Capture by Epitope Imprinting. *Angew. Chemie Int. Ed.* **2006**, *45*, 2392–2396.
5. Dechtrirat, D.; Jetzschmann, K.J.; Stöcklein, W.F.M.; Scheller, F.W.; Gajovic-Eichelmann, N. Protein Rebinding to a Surface-Confined Imprint. *Adv. Funct. Mater.* **2012**, *22*, 5231–5237.
6. Li, D.-Y.; Zhang, X.-M.; Yan, Y.-J.; He, X.-W.; Li, W.-Y.; Zhang, Y.-K. Thermo-sensitive imprinted polymer embedded carbon dots using epitope approach. *Biosens. Bioelectron.* **2016**, *79*, 187–192.
7. Yang, K.; Liu, J.; Li, S.; Li, Q.; Wu, Q.; Zhou, Y.; Zhao, Q.; Deng, N.; Liang, Z.; Zhang, L.; et al. Epitope imprinted polyethersulfone beads by self-assembly for target protein capture from the plasma proteome. *Chem. Commun.* **2014**, *50*, 9521–9524.
8. Yang, K.; Li, S.; Liu, J.; Liu, L.; Zhang, L.; Zhang, Y. Multiepitope Templates Imprinted Particles for the Simultaneous Capture of Various Target Proteins. *Anal. Chem.* **2016**, *88*, 5621–5625.
9. Qin, Y.-P.; Jia, C.; He, X.-W.; Li, W.-Y.; Zhang, Y.-K. Thermosensitive Metal Chelation Dual-Template Epitope Imprinting Polymer Using Distillation–Precipitation Polymerization for Simultaneous Recognition of Human Serum Albumin and Transferrin. *ACS Appl. Mater. Interfaces* **2018**, *10*, 9060–9068.
10. Altintas, Z.; Takiden, A.; Utesch, T.; Mroginski, M.A.; Schmid, B.; Scheller, F.W.; Süssmuth, R.D. Integrated Approaches Toward High-Affinity Artificial Protein Binders Obtained via Computationally Simulated Epitopes for Protein Recognition. *Adv. Funct. Mater.* **2019**, *29*, 1807332.
11. Moczko, E.; Guerreiro, A.; Cáceres, C.; Piletska, E.; Sellergren, B.; Piletsky, S.A. Epitope approach in molecular imprinting of antibodies. *J. Chromatogr. B Anal. Technol. Biomed. Life Sci.* **2019**, *1124*, 1–6.
12. Ma, X.T.; He, X.W.; Li, W.Y.; Zhang, Y.K. Oriented surface epitope imprinted polymer-based quartz crystal microbalance sensor for cytochrome c. *Talanta* **2019**, *191*, 222–228.
13. Xing, R.; Ma, Y.; Wang, Y.; Wen, Y.; Liu, Z. Specific recognition of proteins and peptides via controllable oriented surface imprinting of boronate affinity-anchored epitopes. *Chem. Sci.* **2019**, *10*, 1831–1835.
14. Lee, M.H.; Thomas, J.L.; Su, Z.L.; Yeh, W.K.; Monzel, A.S.; Bolognin, S.; Schwamborn, J.C.; Yang, C.H.; Lin, H.Y. Epitope imprinting of alpha-synuclein for sensing in Parkinson's brain organoid culture medium. *Biosens. Bioelectron.* **2021**, *175*, 112852.
15. Li, S.; Yang, K.; Liu, J.; Jiang, B.; Zhang, L.; Zhang, Y. Surface-Imprinted Nanoparticles Prepared with a His-Tag-Anchored Epitope as the Template. *Anal. Chem.* **2015**, *87*, 4617–4620.
16. Li, S.; Yang, K.; Deng, N.; Min, Y.; Liu, L.; Zhang, L.; Zhang, Y. Thermoresponsive Epitope Surface-Imprinted Nanoparticles for Specific Capture and Release of Target Protein from Human Plasma. *ACS Appl. Mater. Interfaces* **2016**, *8*, 5747–5751.
17. Li, S.; Yang, K.; Zhao, B.; Li, X.; Liu, L.; Chen, Y.; Zhang, L.; Zhang, Y. Epitope imprinting enhanced IMAC (EI-IMAC) for highly selective purification of His-tagged protein. *J. Mater. Chem. B* **2016**, *4*, 1960–1967.

18. Ma, X.; Li, M.; Tong, P.; Zhao, C.; Li, J.; Xu, G. A strategy for construction of highly sensitive glycosyl imprinted electrochemical sensor based on sandwich-like multiple signal enhancement and determination of neural cell adhesion molecule. *Biosens. Bioelectron.* **2020**, *156*, 112150.
19. Li, J.; Ma, X.; Li, M.; Zhang, Y. Does polysaccharide is an idea template selection for glycosyl imprinting? *Biosens. Bioelectron.* **2018**, *99*, 438–442.
